# Supplementary material for: Glycolysis-dependent sulfur metabolism orchestrates morphological plasticity and virulence in fungi
Source: eLife journal article supplement (doi:10.7554/elife.109075), 2025-11-12

Met4-HA/HA

Figure 2E – Met4 levels in SLAD and SLAD+2DG condition

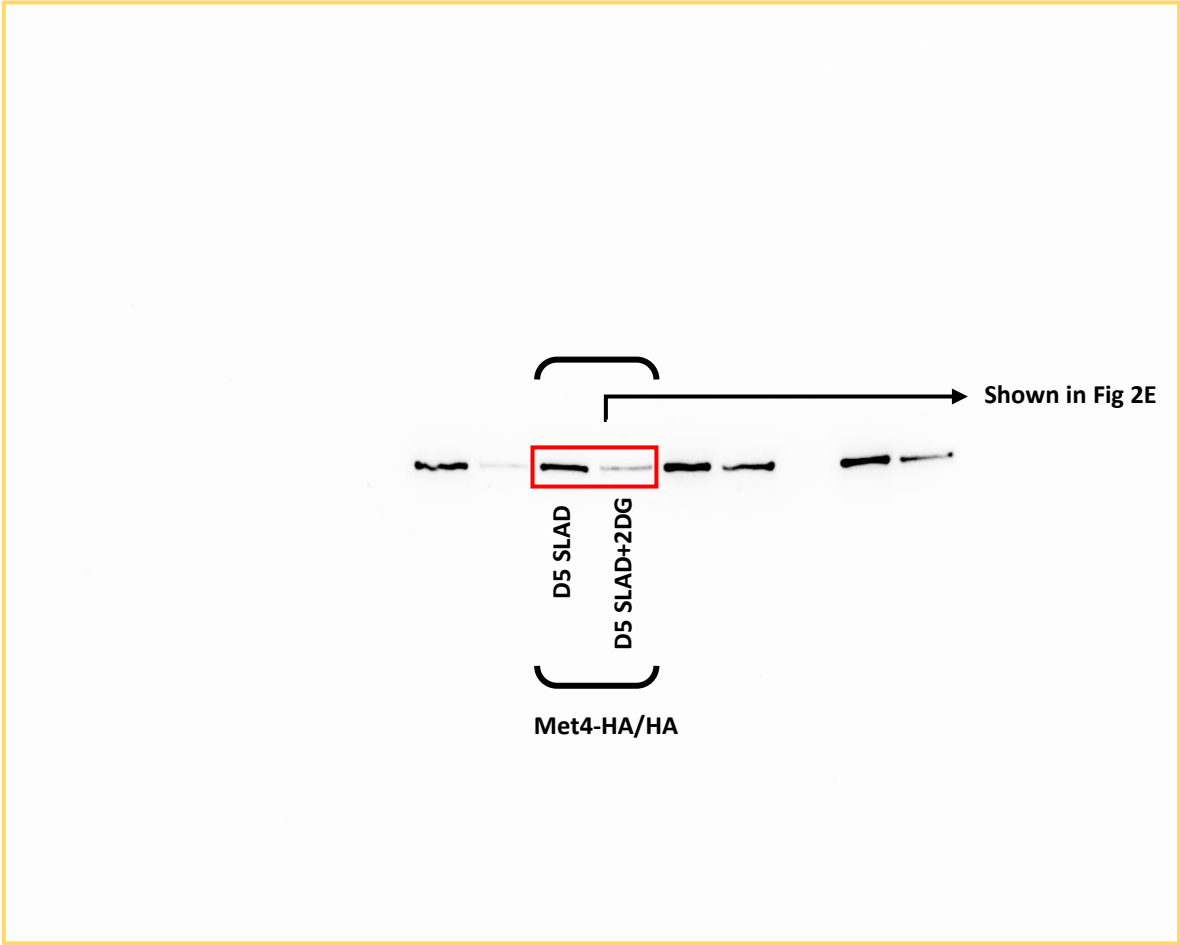

Loading Control-β-actin

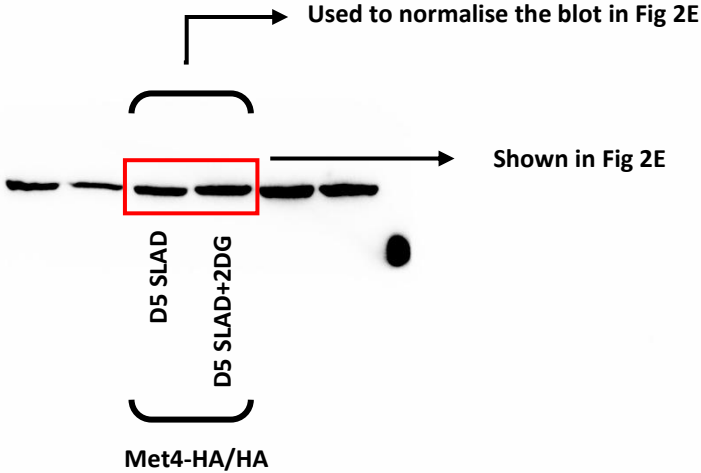

Met32-HA/HA

Figure 2E – Met32 levels in SLAD and SLAD+2DG condition

\*

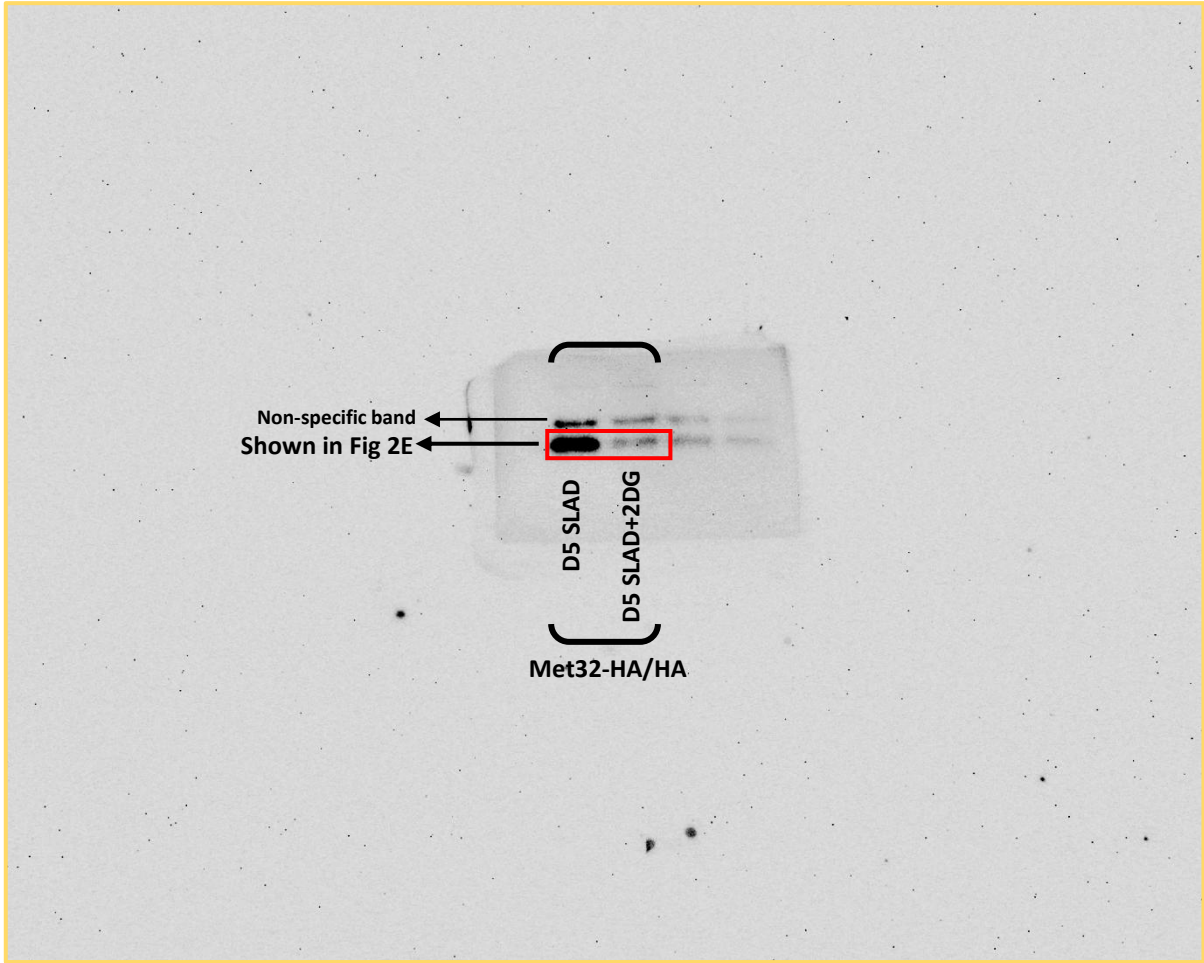

Loading Control-β-actin

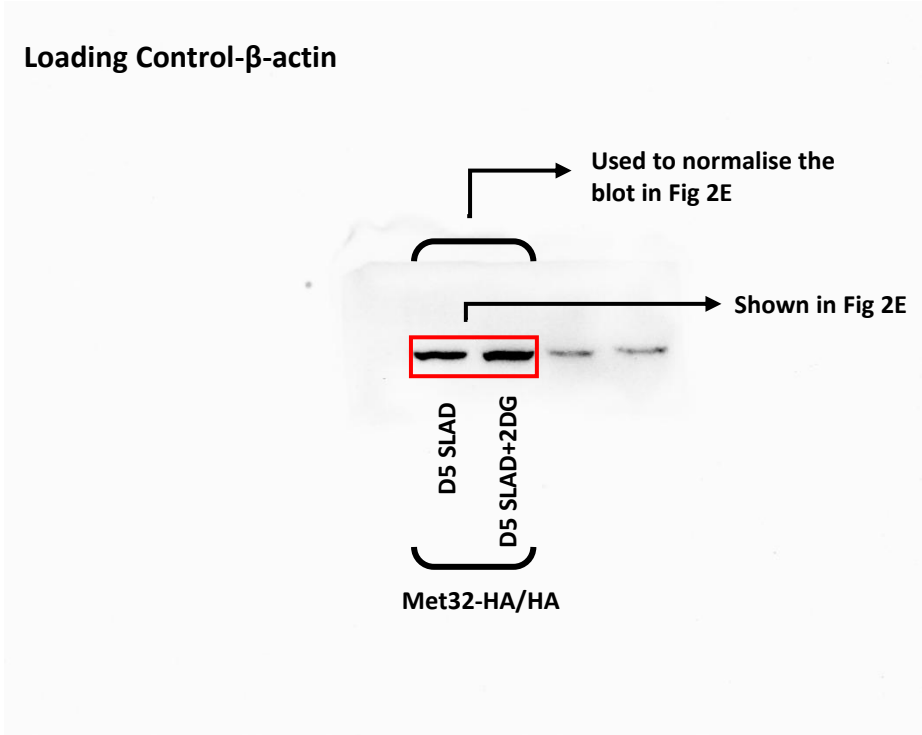

Met16-HA/HA

Figure 2E – Met16 levels in SLAD and SLAD+2DG condition

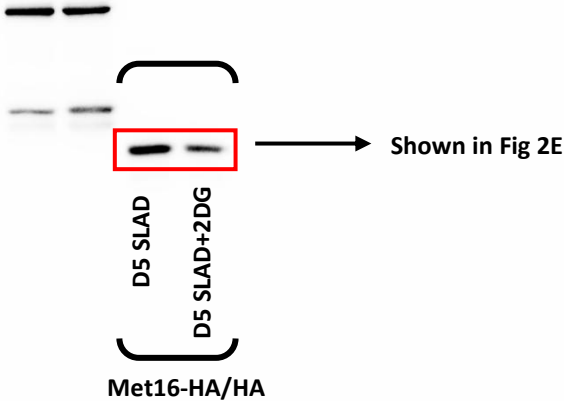

Loading Control-β-actin

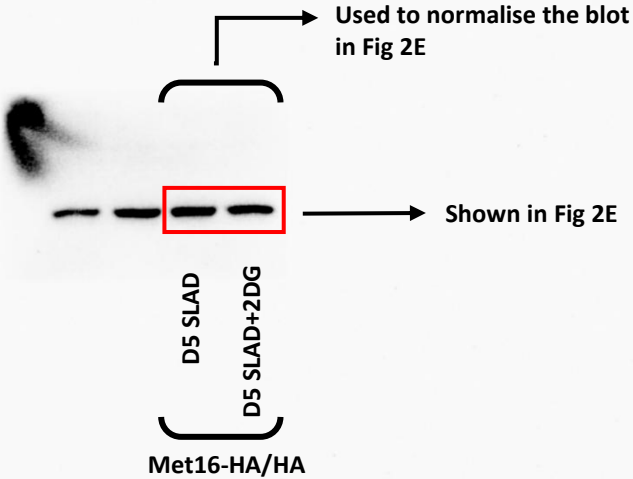

Met10-HA/HA

Figure 2E – Met10 levels in SLAD and SLAD+2DG condition

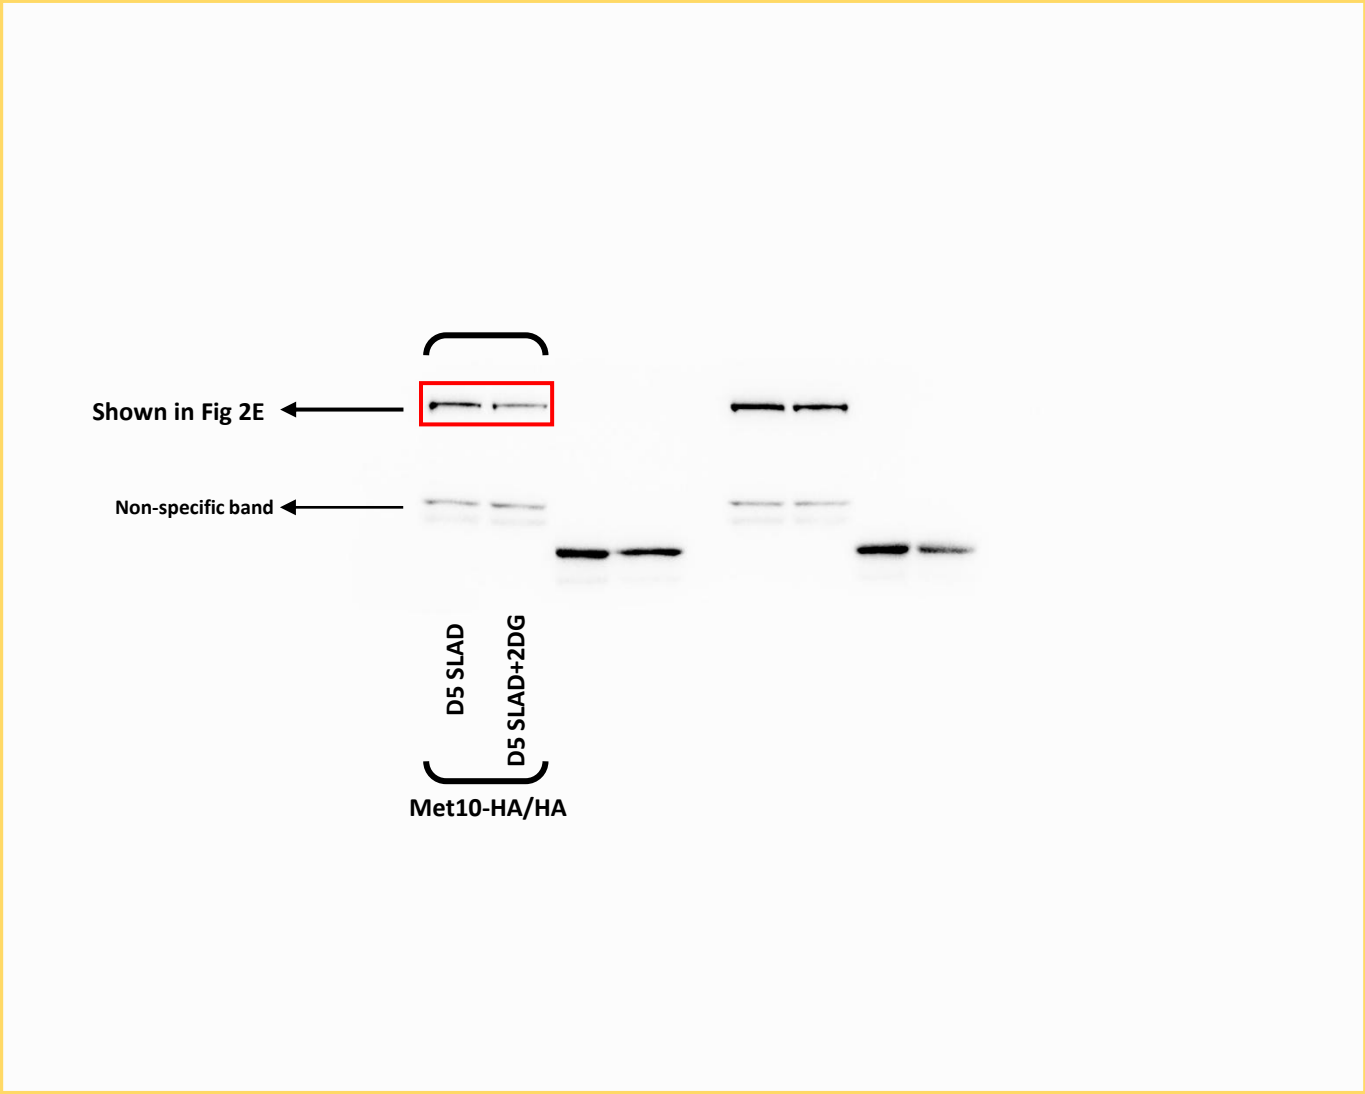

Loading Control-β-actin

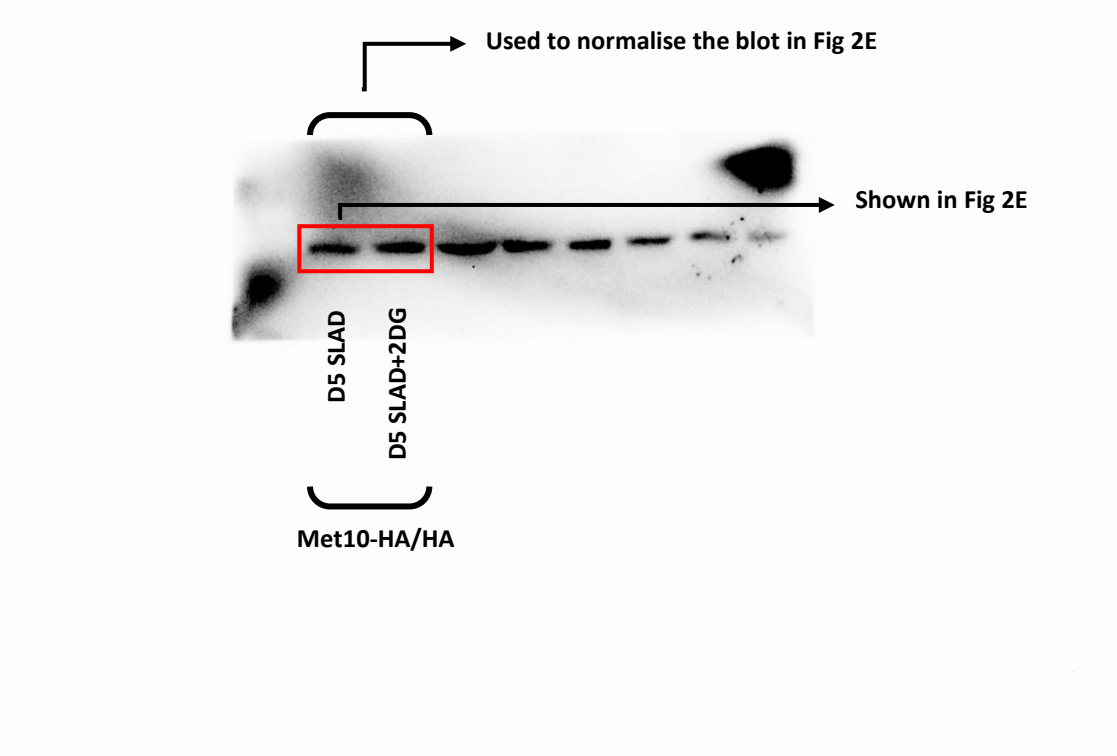

## Cys4-HA/HA

Figure 2E – Cys4 levels in SLAD and SLAD+2DG condition

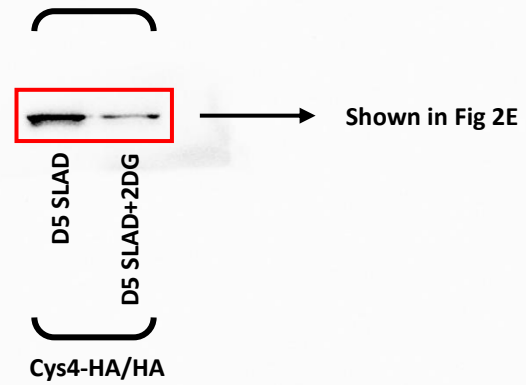

## Loading Control- $\beta$ -actin

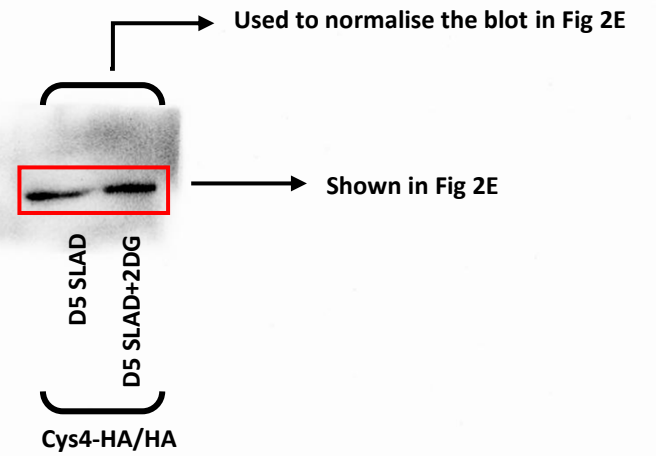

Cys3-HA/HA

Figure 2E – Cys3 levels in SLAD and SLAD+2DG condition

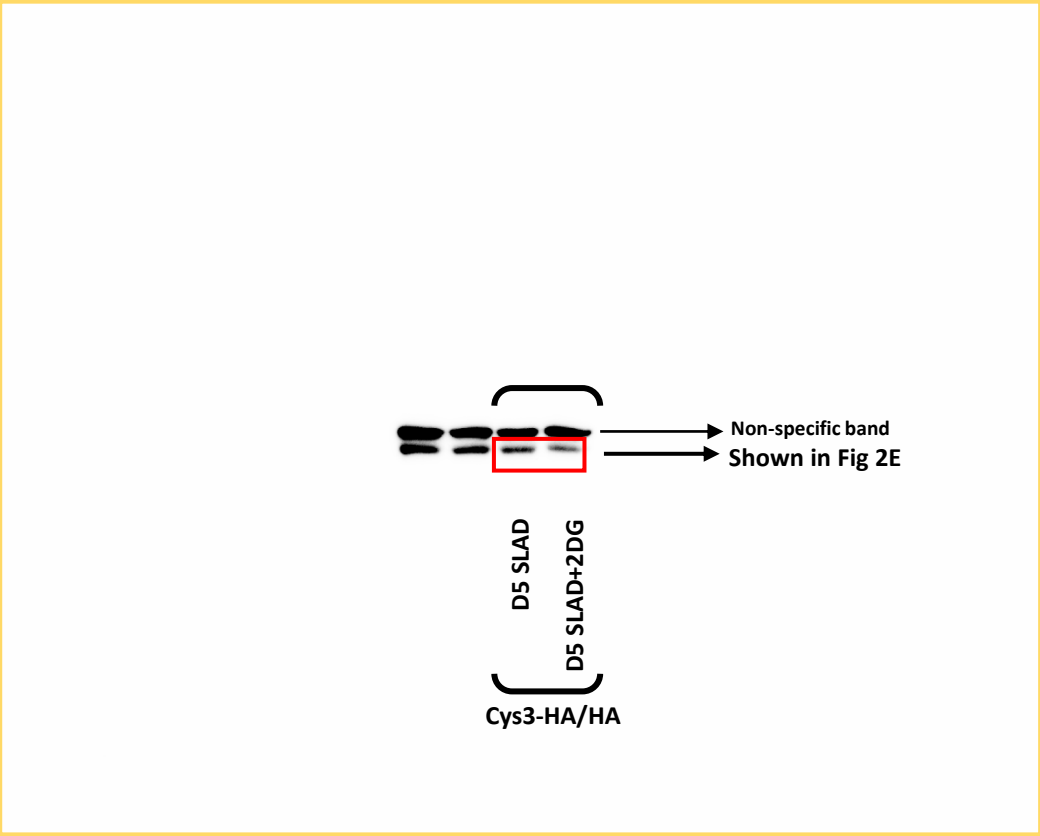

Loading Control-β-actin

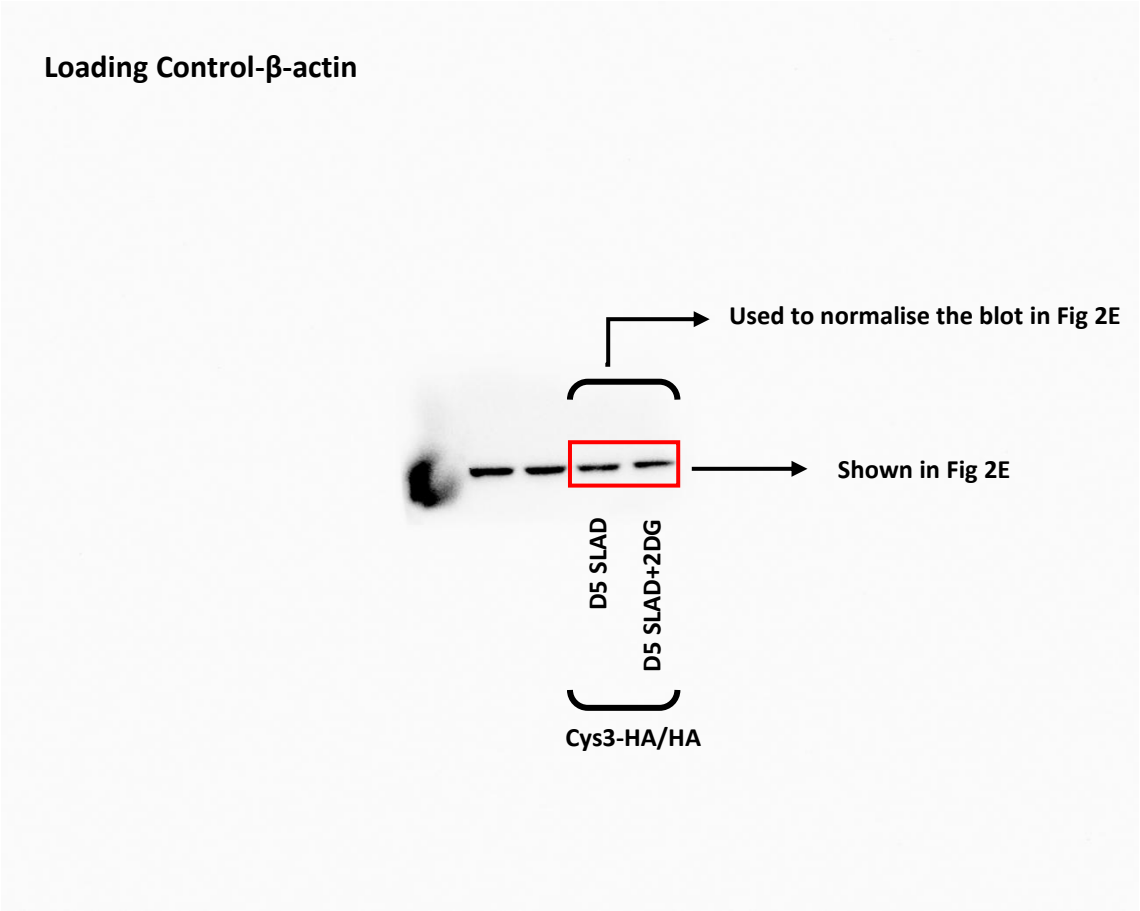

Supplement: fig2-data1 [file Figure 2-source data, uncropped and labelled blots.pdf › Figure 2-source Data 1/Figure 2-source data, uncropped and labelled blots.pdf]
