# Supplementary material for: Glycolysis-dependent sulfur metabolism orchestrates morphological plasticity and virulence in fungi
Source: eLife journal article supplement (doi:10.7554/elife.109075), 2025-11-12

Met32-HA/HA

Figure 2-figure supplement 2B – Met32 levels in SLAD and SLAD+2DG condition in liquid medium

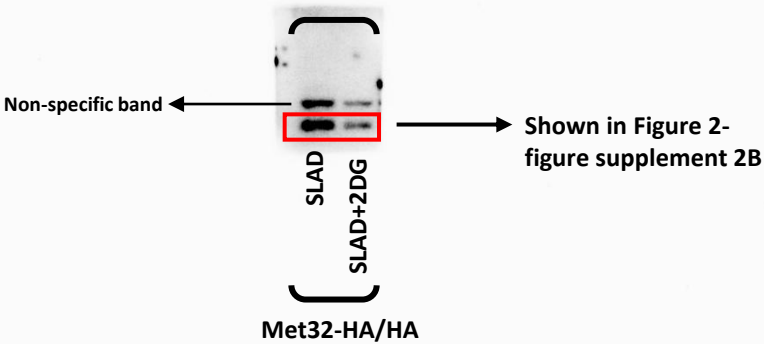

Loading Control-Pgk1

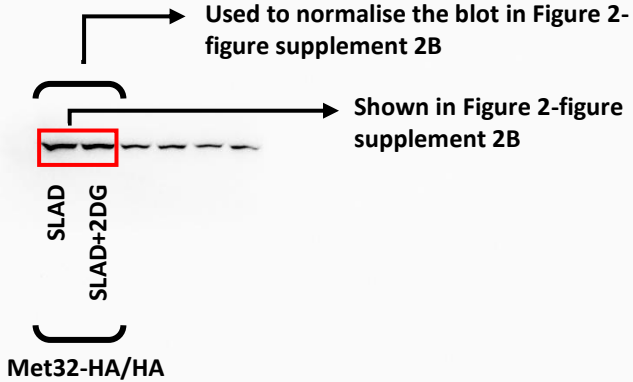

Met16-HA/HA

Figure 2-figure supplement 2B – Met16 levels in SLAD and SLAD+2DG condition in liquid medium

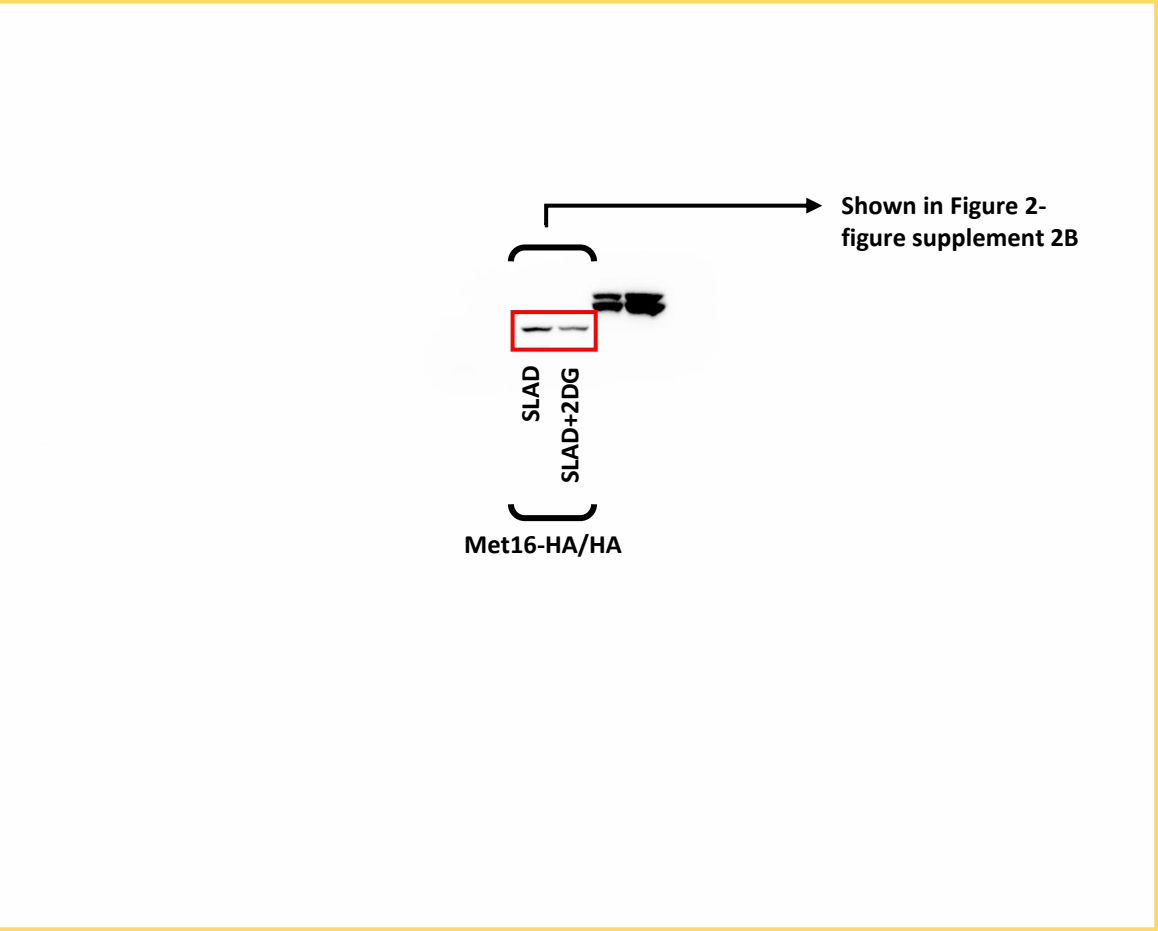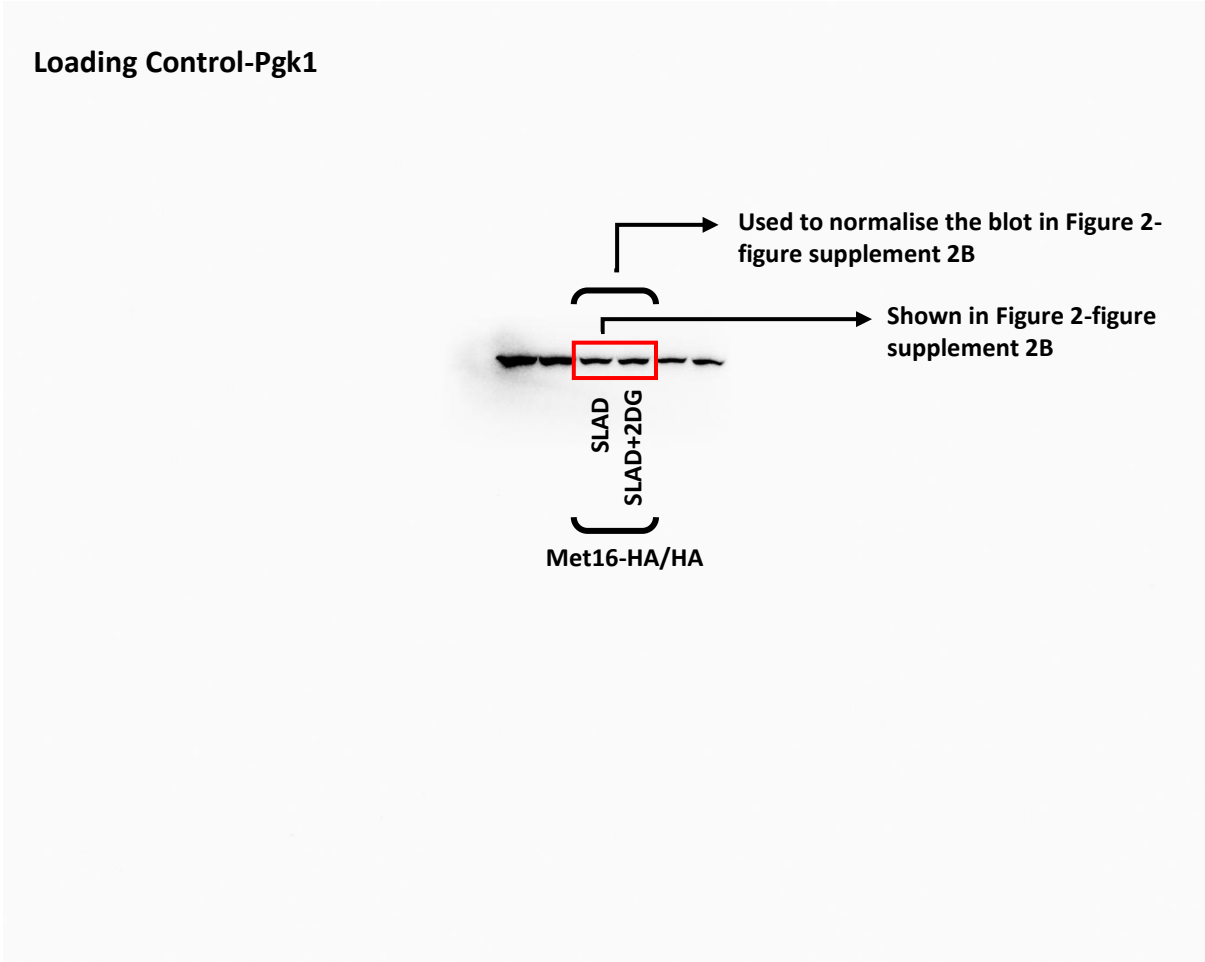

Met10-HA/HA

Figure 2-figure supplement 2B – Met10 levels in SLAD and SLAD+2DG condition in liquid medium

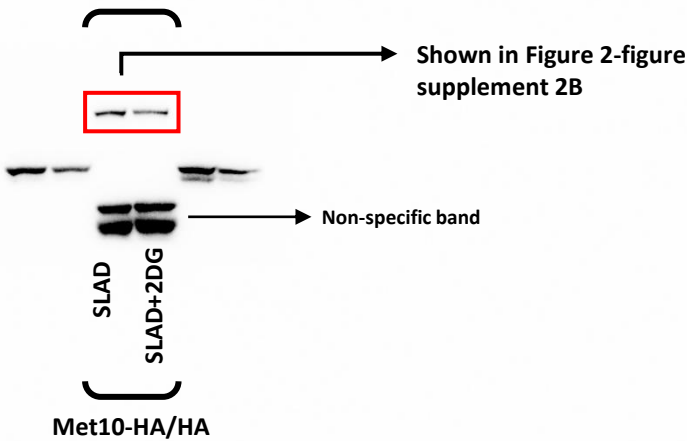

Loading Control-Pgk1

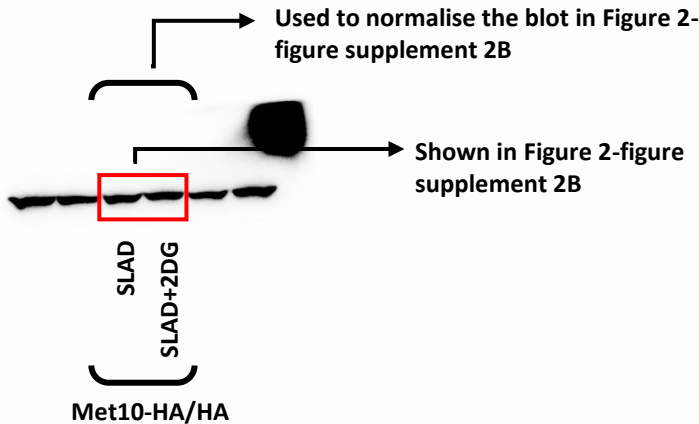

Cys3-HA/HA

Figure 2-figure supplement 2B – Cys3 levels in SLAD and SLAD+2DG condition in liquid medium

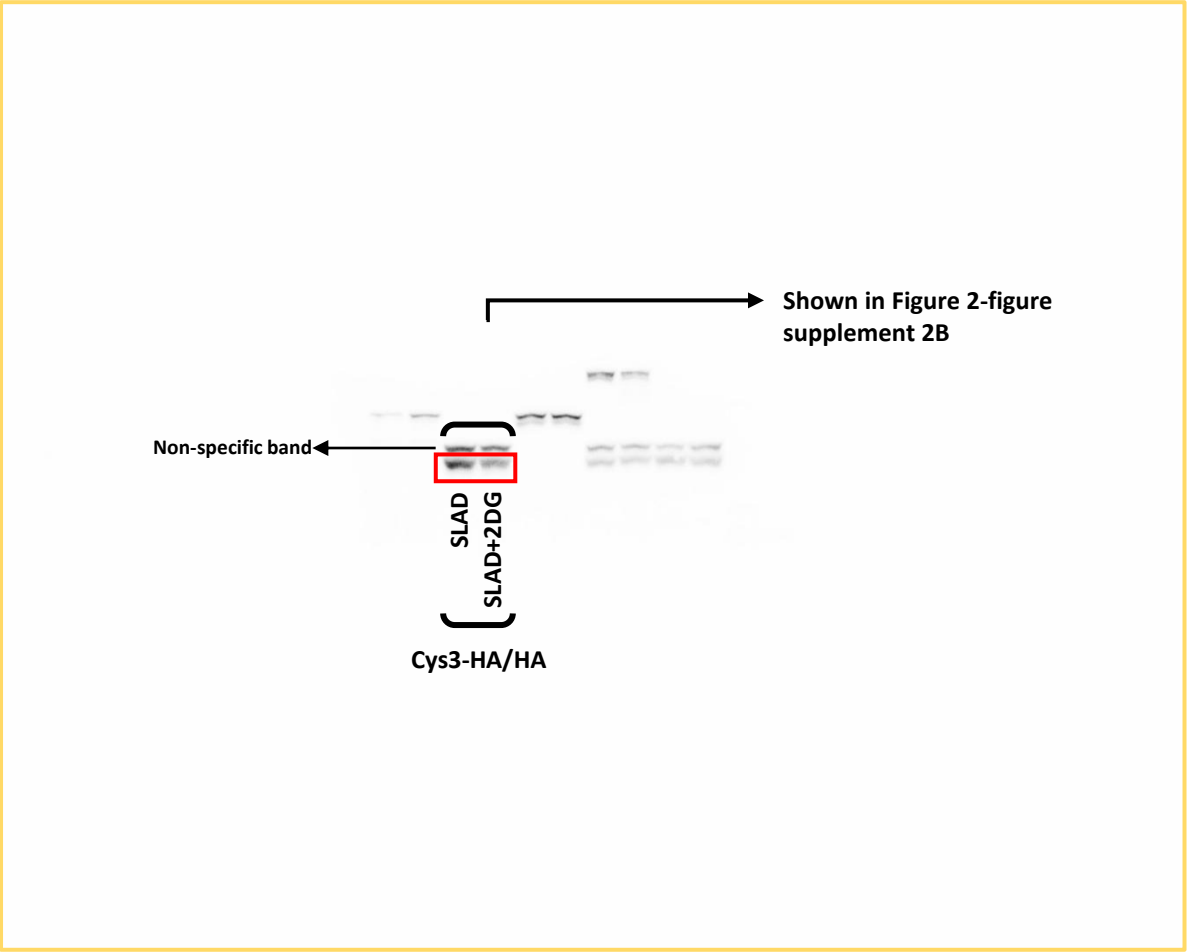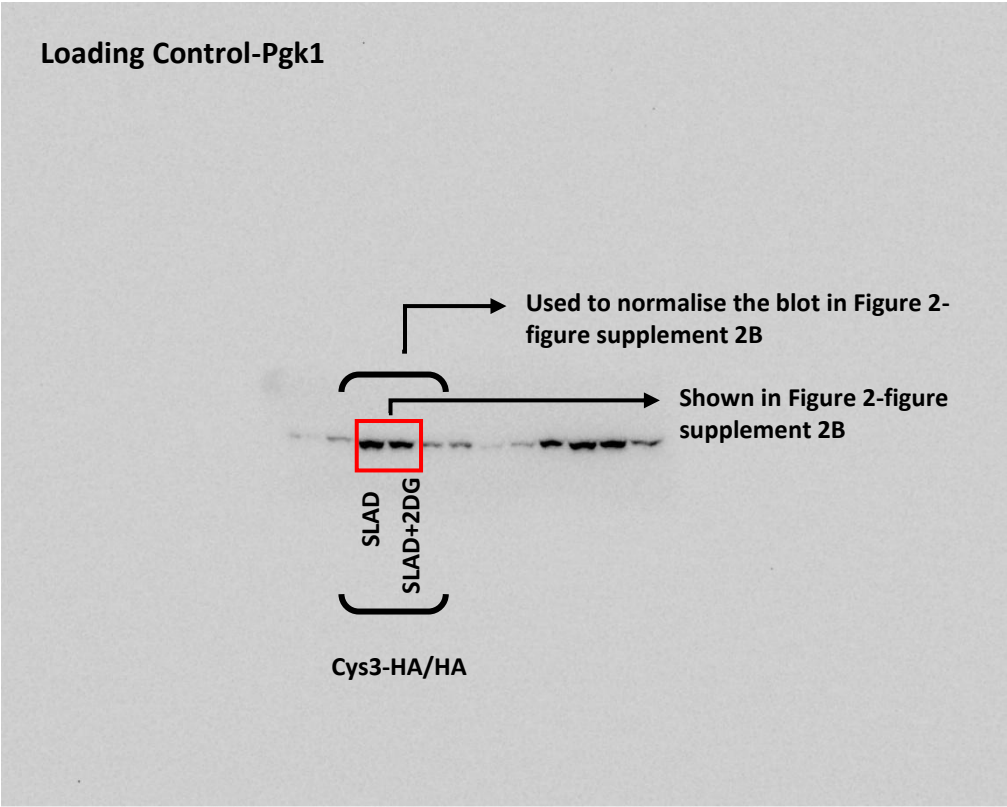

Supplement: fig2-figsupp2-data1 [file Figure 2-figure supplement 2-uncropped and labelled blots.pdf › Figure 2-figure supplement 2-source data 1/Figure 2-figure supplement 2-uncropped and labelled blots.pdf]
