# Supplementary material for: Glycolysis-dependent sulfur metabolism orchestrates morphological plasticity and virulence in fungi
Source: eLife journal article supplement (doi:10.7554/elife.109075), 2025-11-12

*Δmet30*/Met4-HA/HA

Figure 3H – Met4 levels in SLAD and SLAD+2DG condition

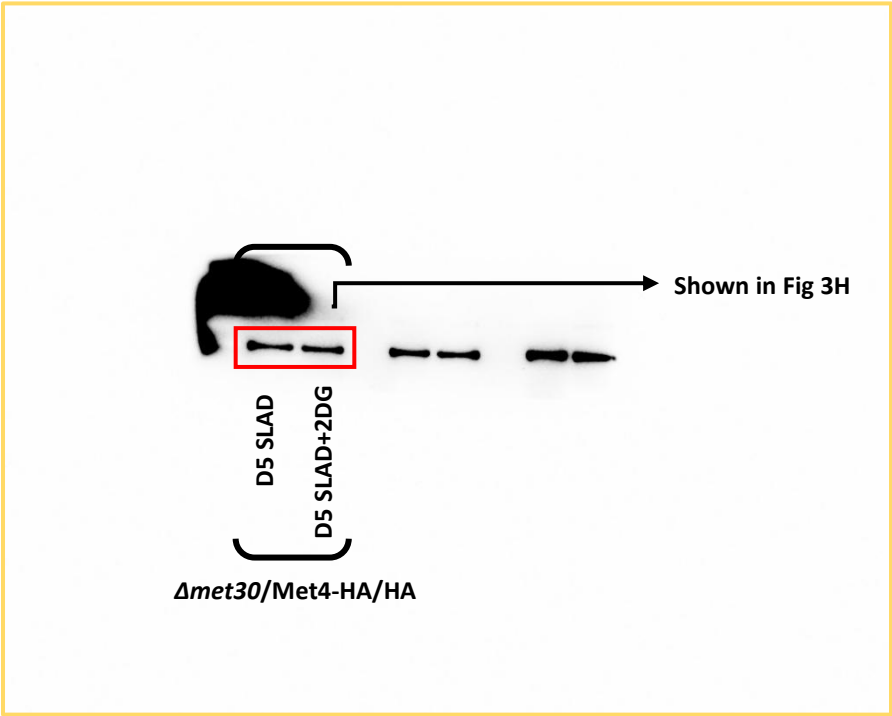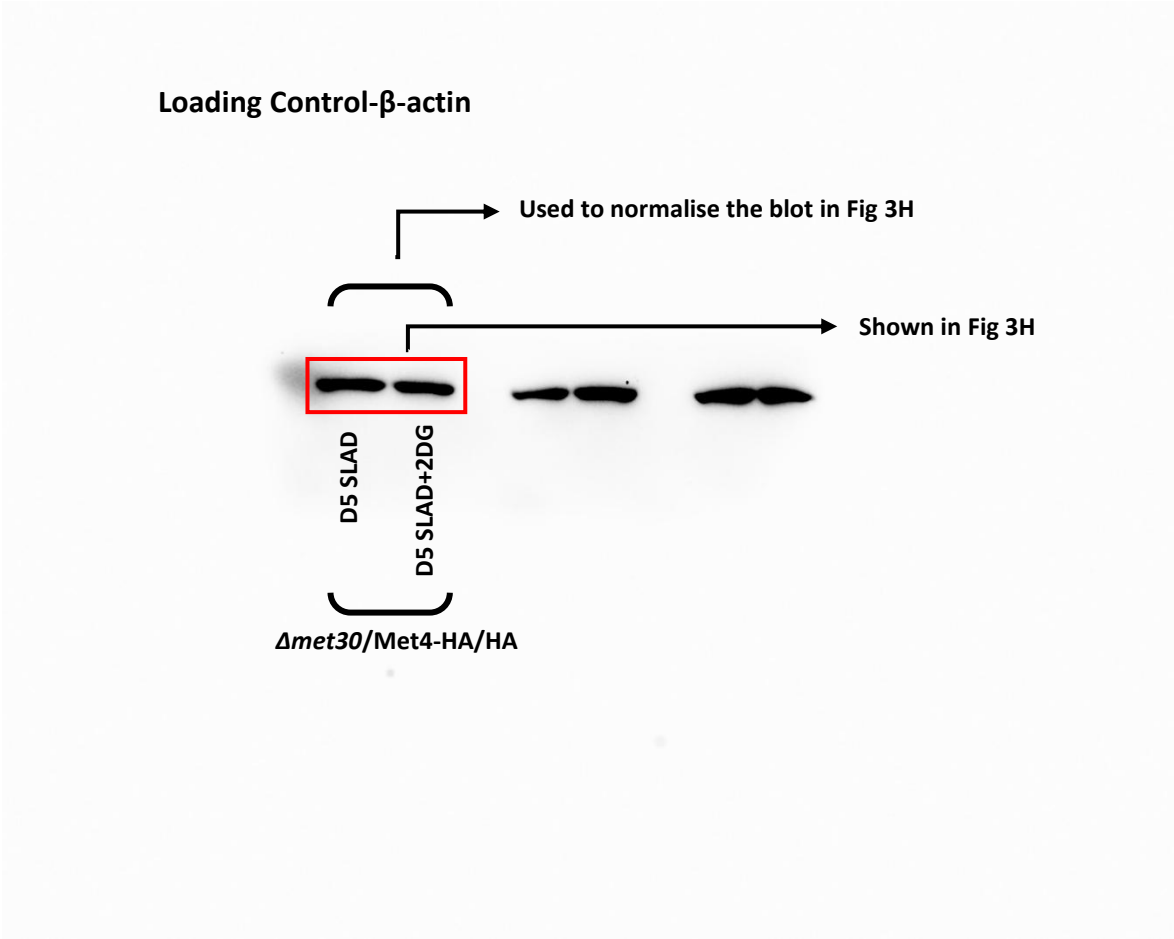

## $\Delta met30$ /Met32-HA/HA

Figure 3H – Met32 levels in SLAD and SLAD+2DG condition

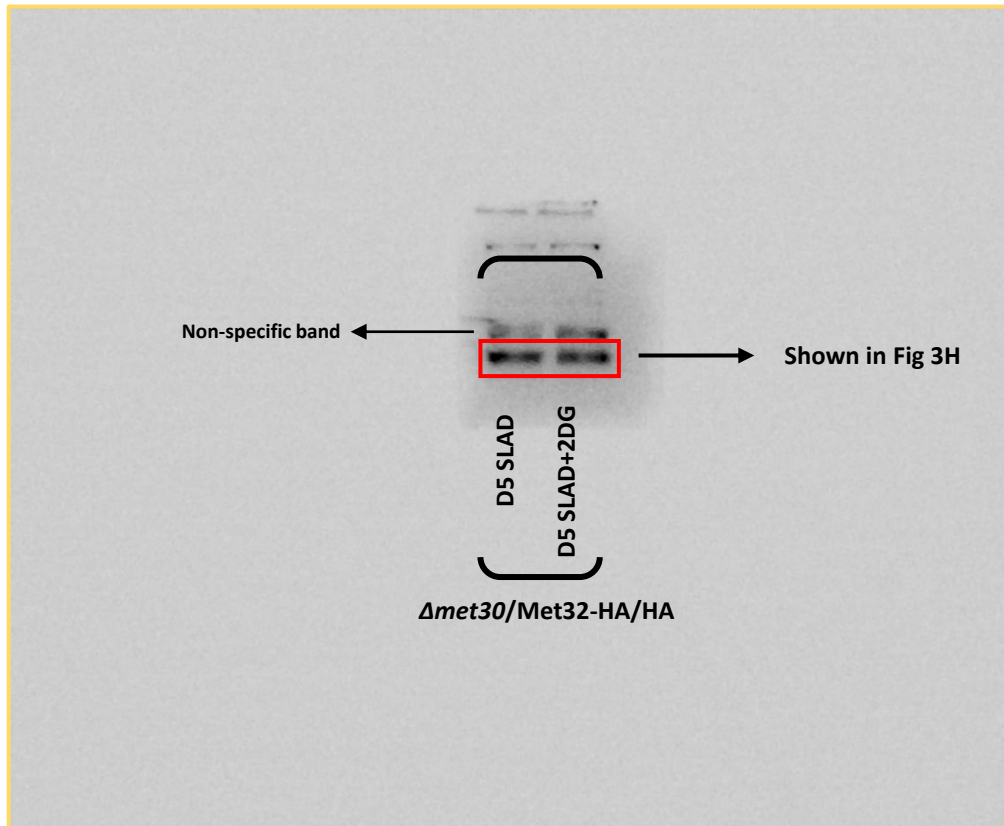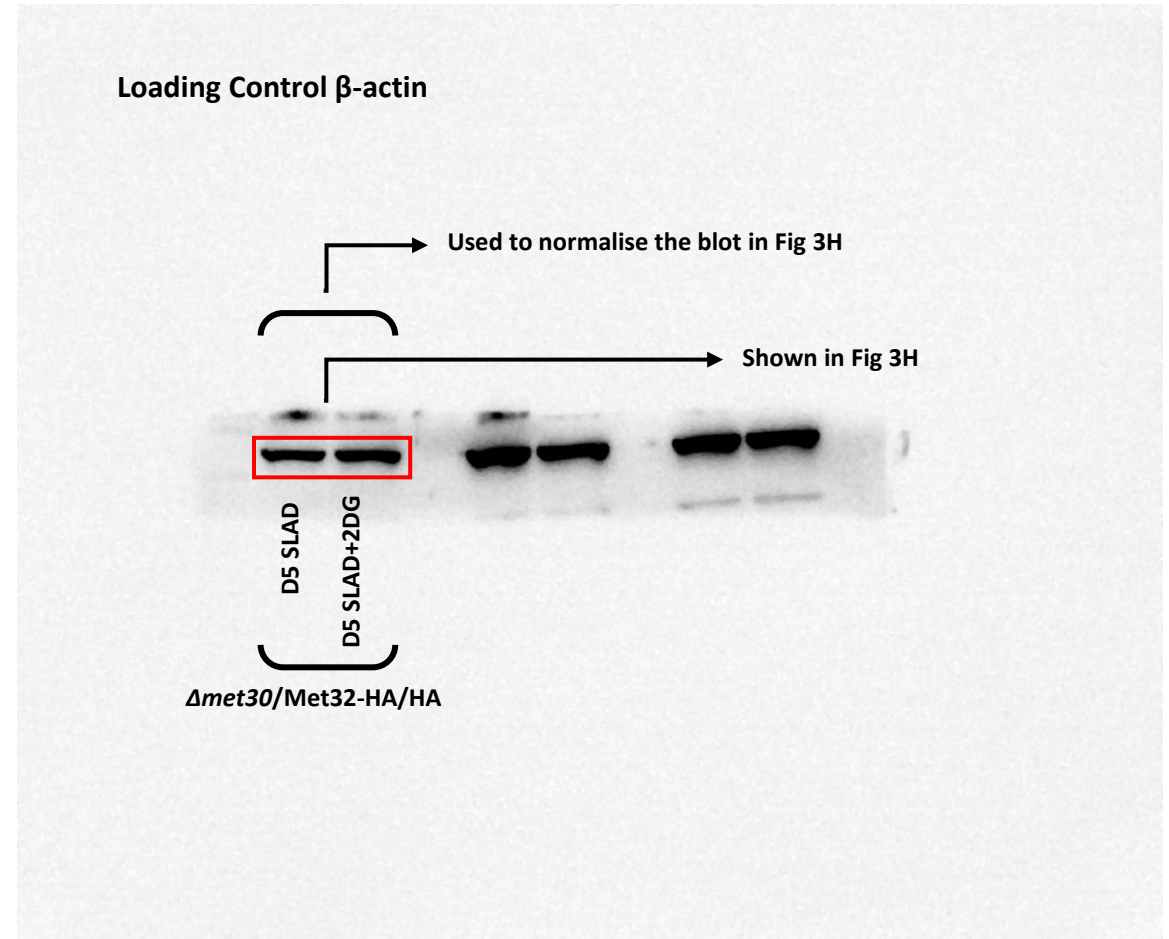

## $\Delta met30$ /Met16-HA/HA

Figure 3H – Met16 levels in SLAD and SLAD+2DG condition

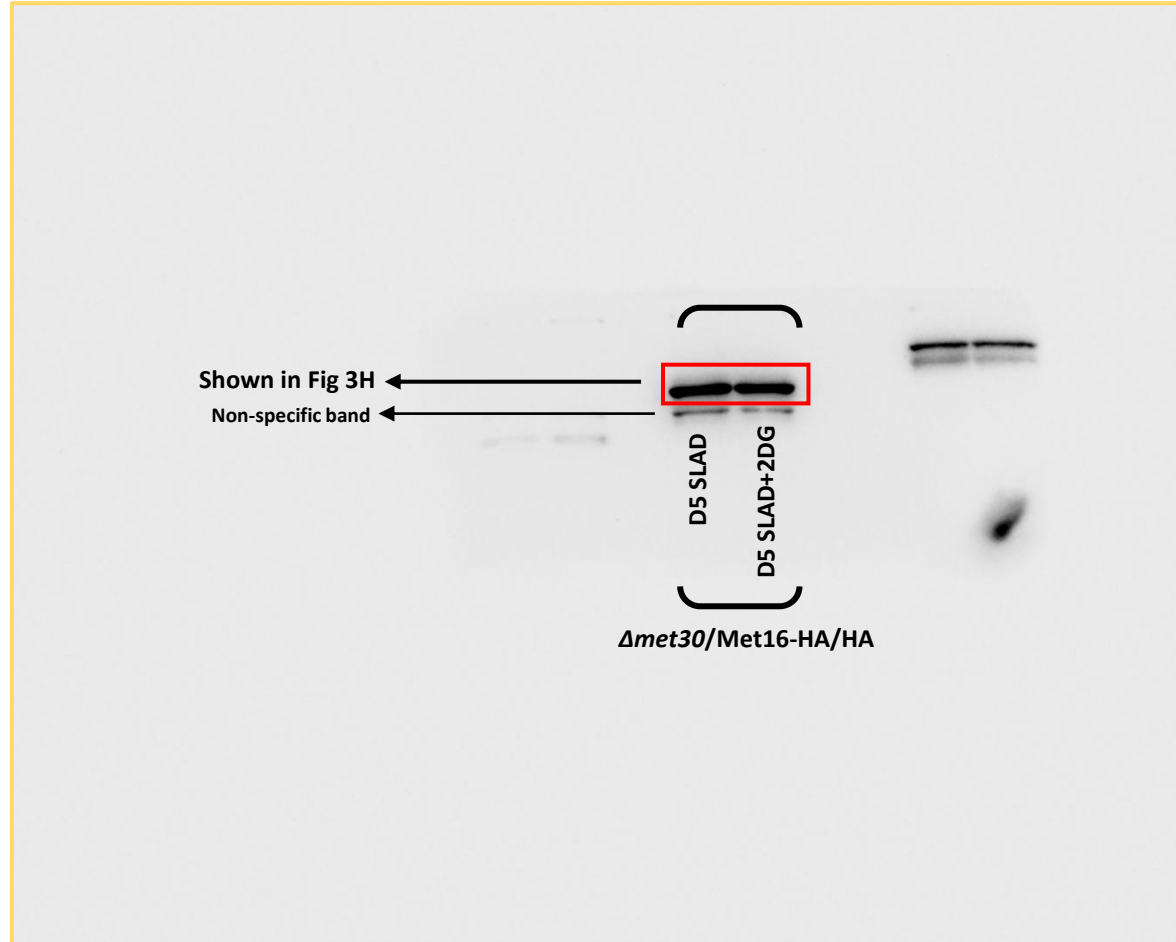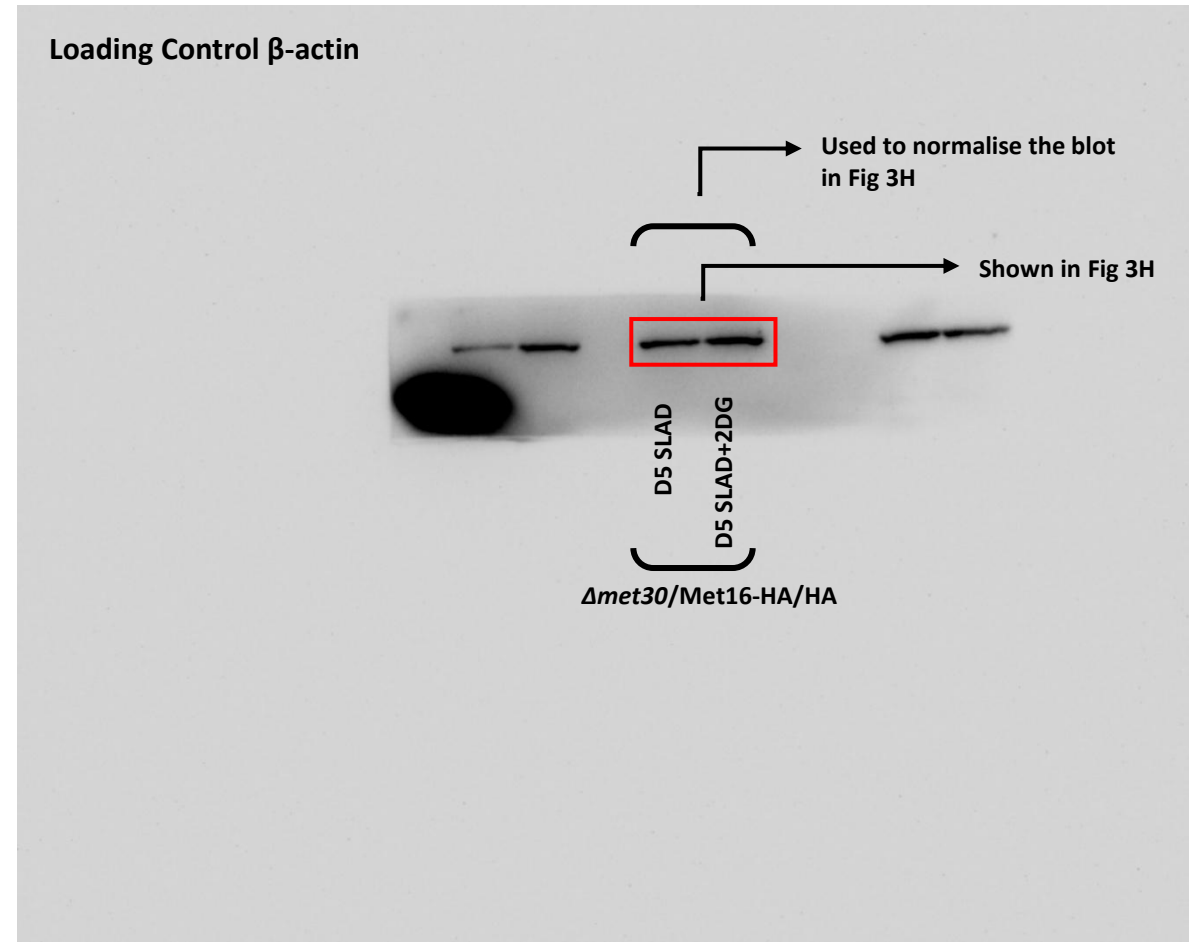

# $\Delta met30/Cys3-HA/HA$

Figure 3H – Cys3 levels in SLAD and SLAD+2DG condition

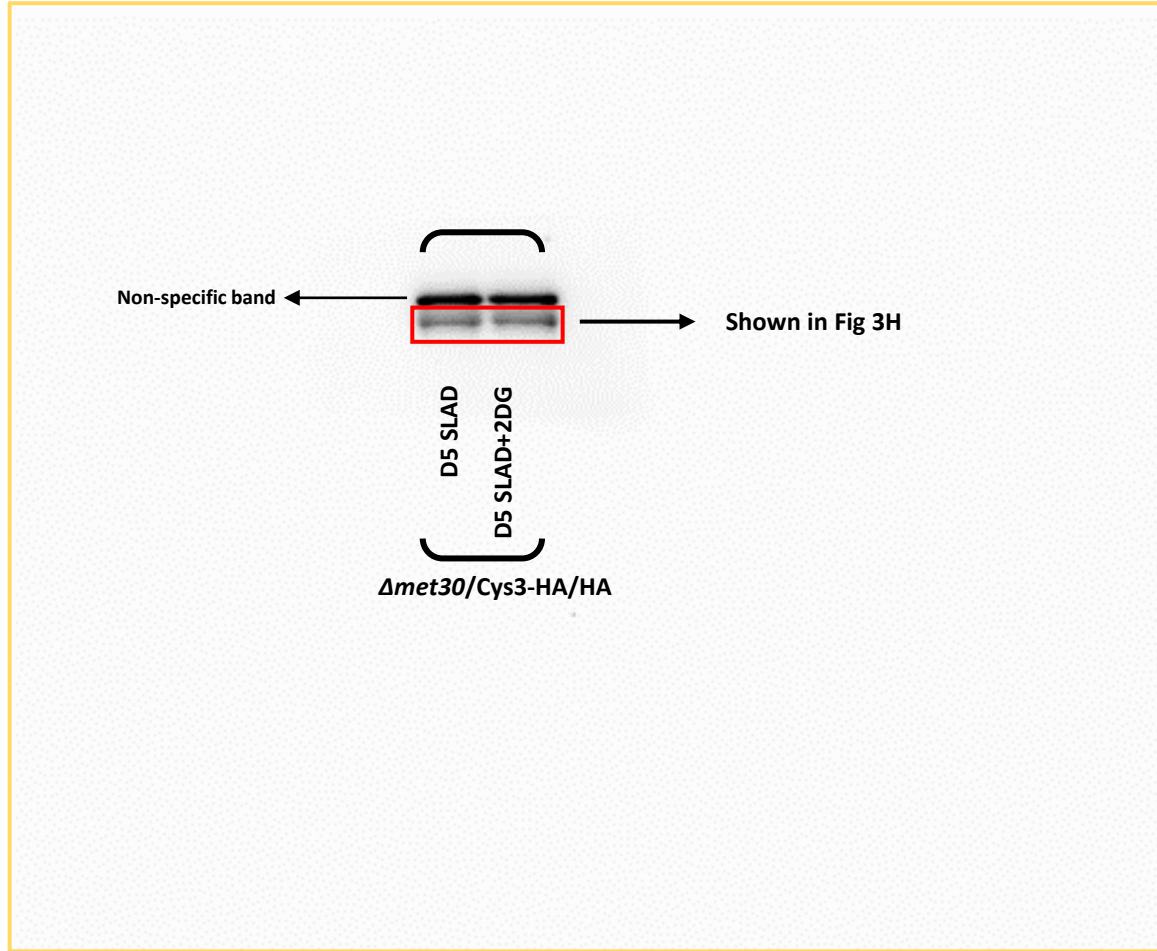

Loading Control  $\beta$ -actin

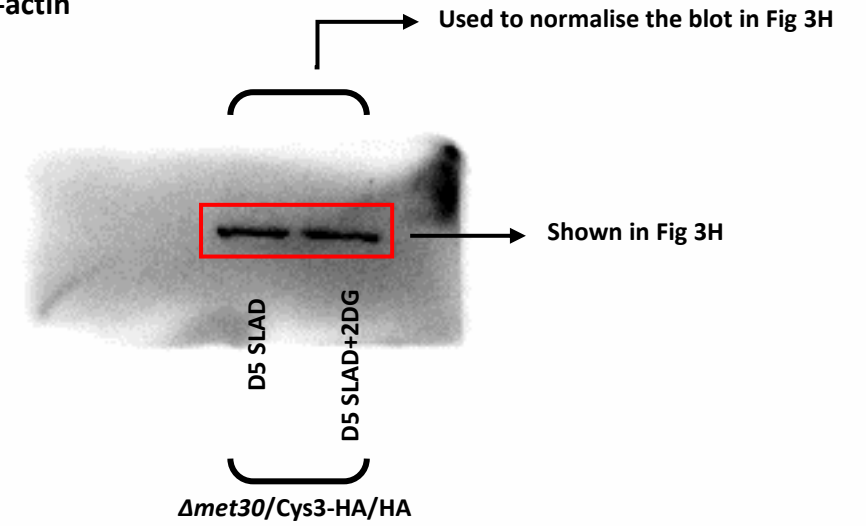

Met30-HA/HA

Figure 3J – Met30 levels in SLAD and SLAD+2DG condition

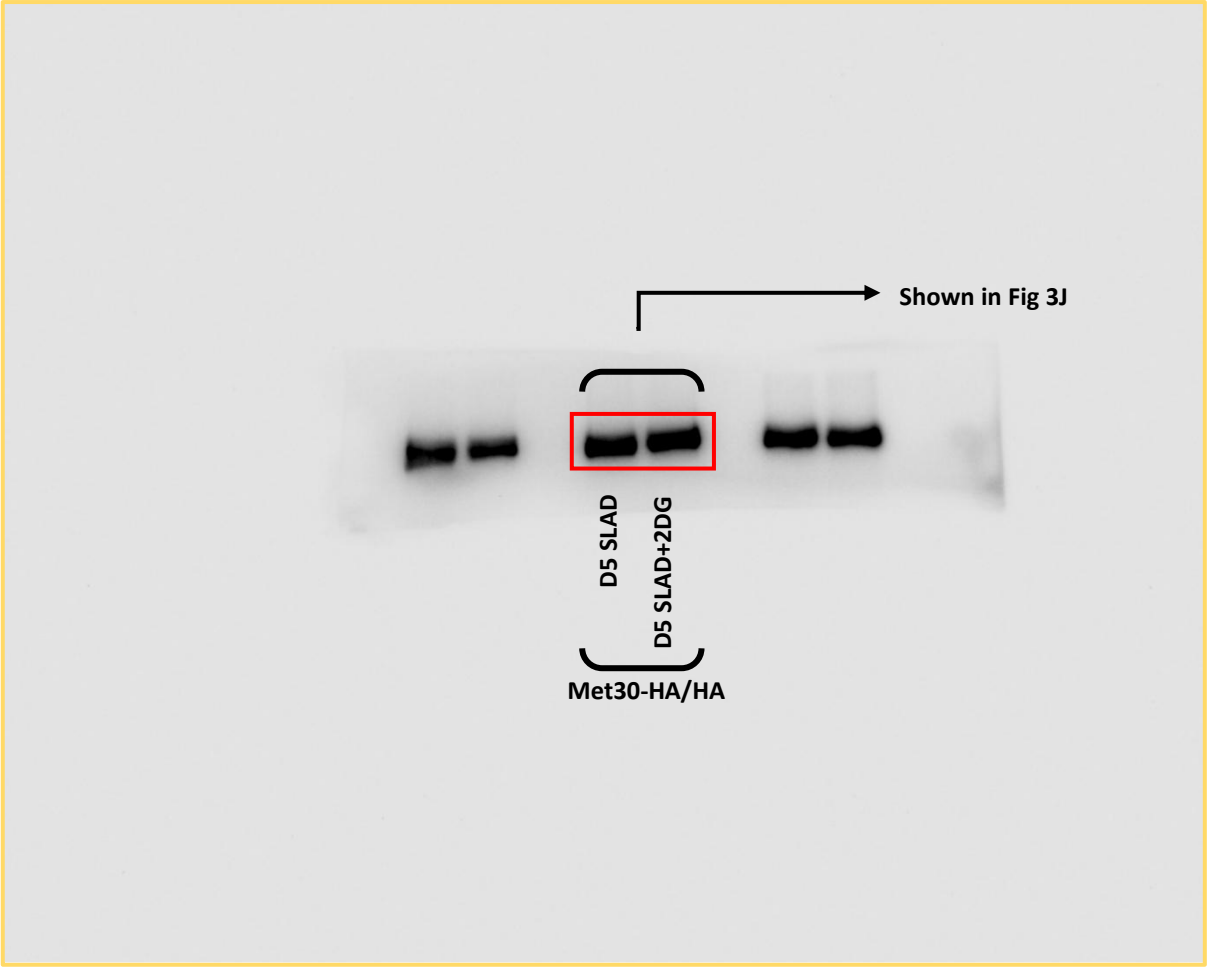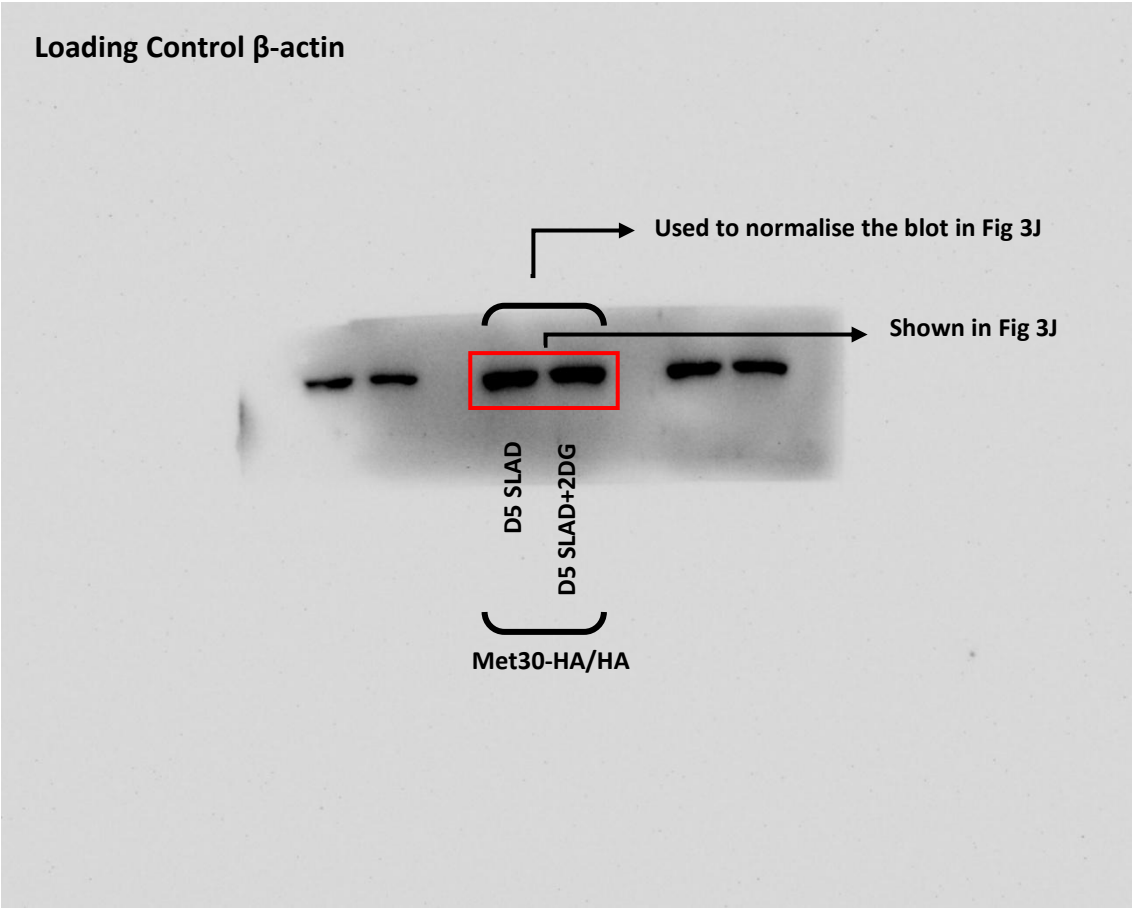

Supplement: fig3-data1 [file Figure 3-source data, uncropped and labelled blots.pdf › Figure 3-source Data 1/Figure 3-source data, uncropped and labelled blots.pdf]
